# Supplementary material for: Fingerprinting antioxidative activities in plants
Source: Springer Nature journal article supplement (doi:10.1186/1746-4811-5-2), 2009-01-01
Supplement: Additional file 4 [file 1746-4811-5-2-s4.pdf]

**Experimental Design**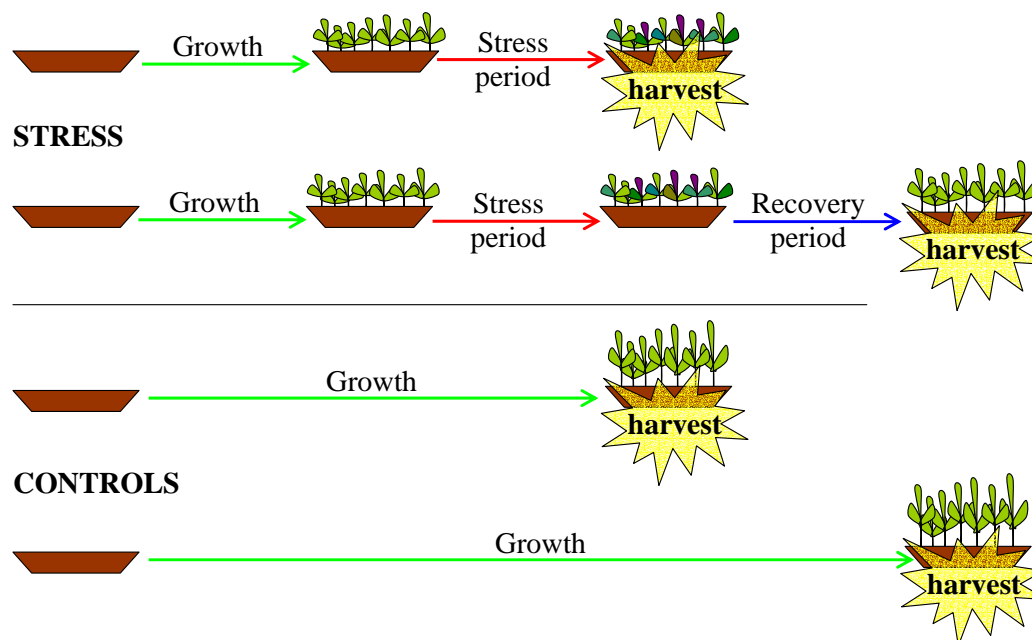**Figure 4.1** Experimental design.

*Lepidium sativum* seedlings were grown for several days, challenged with abiotic stress and harvested. A part of stressed plants was given a recovery period. Untreated plant material (controls) was always harvested in parallel.

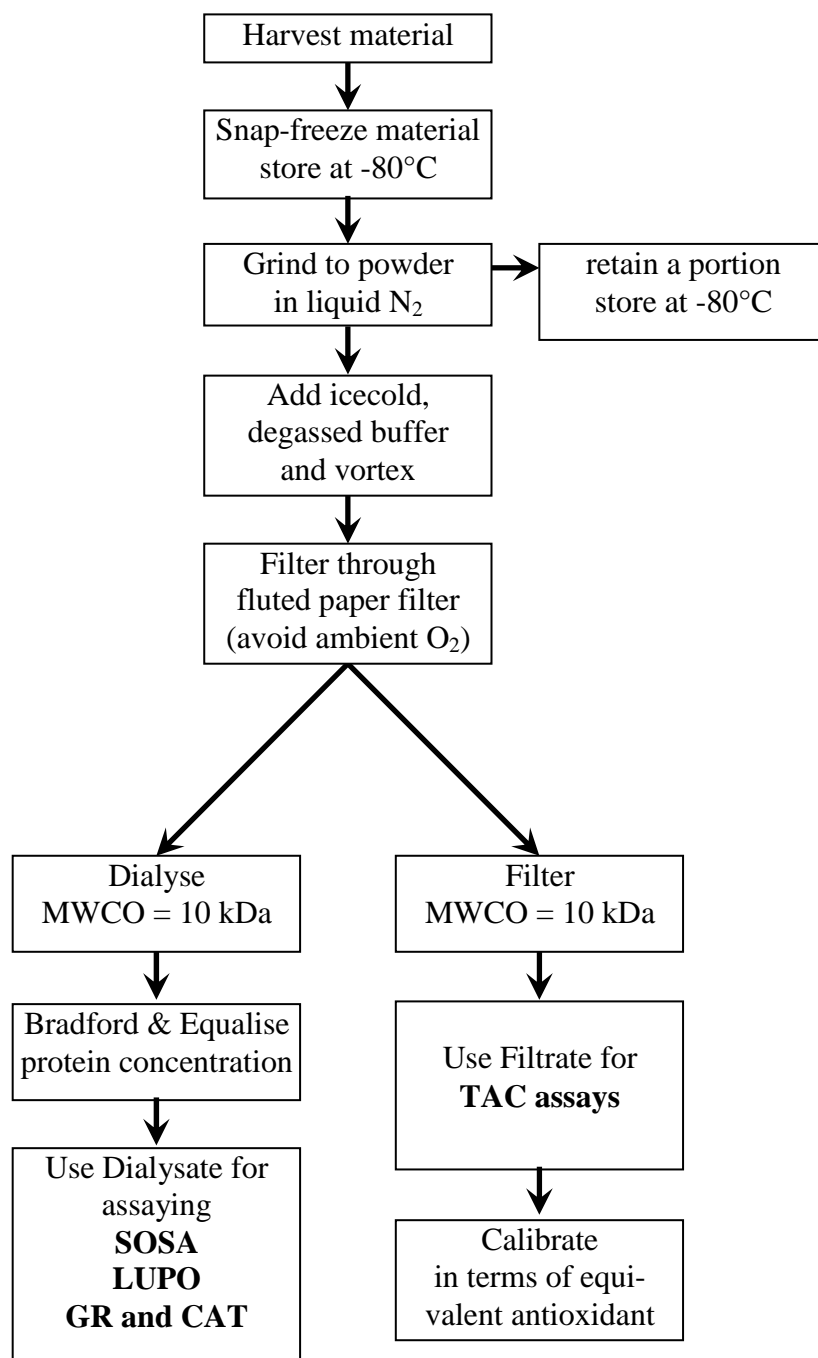

**Figure 4.2** Flow chart for processing plant material.
